# Supplementary material for: Vibrio vulnificus and Vibrio parahaemolyticus in Oysters under Low Tidal Range Conditions: Is Seawater Analysis Useful for Risk Assessment?
Source: MDPI journal article supplement (doi:10.3390/foods11244065), 2022-12-16
Supplement: s1 [file s1]

## Supplementary Materials

### ***Vibrio vulnificus* and *Vibrio parahaemolyticus* in oysters under low tidal range conditions: is seawater analysis useful for risk assessment?**

Corinne Audemard<sup>1</sup>, Tal Ben-Horin<sup>2</sup>, Howard I. Kator<sup>1</sup> and Kimberly S. Reece<sup>1</sup>

<sup>1</sup> Virginia Institute of Marine Science, William & Mary, P.O. Box 1346, Gloucester Point, Virginia, USA

<sup>2</sup> College of Veterinary Medicine, North Carolina State University, Morehead City, NC, USA

Table S1: Quantitative PCR primers and probes used in this study.

| Primer or Probe     | Sequence (5' to 3')             | Modifications       | Source |
|---------------------|---------------------------------|---------------------|--------|
| <i>tlh</i> forward  | ACTCAACACAAGAAGAGAT CGACAA      |                     | [13]   |
| <i>tlh</i> reverse  | GATGAGCGGTTGATGT CCAA           |                     |        |
| <i>tlh</i> probe    | CGCTCGCGTTTCACGAAA CCGT         | 5' TxRED to 3' BHQ2 |        |
| <i>tdh</i> forward  | TCCCTTTTCCTGCCCCC               |                     |        |
| <i>tdh</i> reverse  | CGCTGCCATTGTATAGTCTT TATC       |                     |        |
| <i>tdh</i> probe    | TGACATCCTACATGAC TGTG           | 5' FAM to 3' MGBNFQ |        |
| <i>trh</i> forward  | TTGCTTTCAGTTTGCTATT GGCT        |                     |        |
| <i>trh</i> reverse  | TGTTTACCGTCATATAGGC GCTT        |                     |        |
| <i>trh</i> probe    | AGAAATACAACAATCAAAA CTGA        | 5' NED to 3' MGBNFQ |        |
| IAC forward         | GACATCGATATGGGTGCCG             |                     |        |
| IAC reverse         | CGAGACGATGCAGCCATTC             |                     |        |
| IAC probe           | TCTCATGCGTCTCCCTGGTGAATGTG      | 5' Cy5 to 3' BHQ2   |        |
| <i>vvhA</i> forward | TGTTTATGGTGAGAACGGTGACA         |                     | [25]   |
| <i>vvhA</i> reverse | TTCTTTATCTAGGCCCCCAAACCTTG      |                     |        |
| <i>vvhA</i> probe   | CCGTTAACCGAACCACCCGCAA          | 5' TAMRA to 3' FAM  |        |
| <i>pilF</i> forward | GATTGACTACGAYCCACACCG           |                     | [27]   |
| <i>pilF</i> reverse | GRCGCGCTTGGGTGTAG               |                     |        |
| <i>pilF</i> probe   | TGCTCAACCTCGCTAAGTTGGAAATCGATAC | 5' TAMRA to 3' FAM  |        |

Table S2: Percentage of positive samples for each gene targeted in the study

|                       | Y1                                                                                   |            |             | Y2         |            |            |
|-----------------------|--------------------------------------------------------------------------------------|------------|-------------|------------|------------|------------|
|                       | Low                                                                                  | Mod.-1     | Mod.-2      | Low        | Mod.-1     | High       |
|                       | % of detection of each target (number of positives/total number of analyzed samples) |            |             |            |            |            |
| <i>vvhA</i> +-oyster  | 88 (28/32)                                                                           | 81 (32/26) | 89 (25/28)  | 92 (59/64) | 84 (54/64) | 66 (42/64) |
| <i>vvhA</i> +-water   | 100 (8/8)                                                                            | 75 (6/8)   | 86 (6/7)    | 81 (13/16) | 81 (13/16) | 63 (10/16) |
| <i>pilF</i> + -oyster | 100 (10/10)                                                                          | 100 (8/8)  | 100 (12/12) | 83 (53/64) | 81 (52/64) | 28 (18/64) |
| <i>pilF</i> + -water  | 100 (3/3)                                                                            | 100 (3/3)  | 100 (3/3)   | 75 (12/16) | 75 (12/16) | 25 (4/16)  |
| <i>tlh</i> +-oyster   | 91 (29/32)                                                                           | 91 (29/32) | 96 (27/28)  | 86 (55/64) | 98 (63/64) | 66 (42/64) |
| <i>tlh</i> +-water    | 88 (7/8)                                                                             | 75 (6/8)   | 100 (7/7)   | 75 (12/16) | 88 (14/16) | 88 (14/16) |
| <i>tdh</i> +-oyster   | 25 (8/32)                                                                            | 34 (11/32) | 39 (11/28)  | 28 (18/64) | 67 (43/64) | 25 (16/64) |
| <i>tdh</i> +-water    | 0 (0/8)                                                                              | 13 (1/8)   | 14 (1/7)    | 6 (1/16)   | 25 (4/16)  | 25 (4/16)  |
| <i>trh</i> +-oyster   | 44 (14/32)                                                                           | 34 (11/32) | 54 (15/28)  | 17 (11/64) | 53 (34/64) | 0 (0/64)   |
| <i>trh</i> +-water    | 13 (1/13)                                                                            | 38 (3/8)   | 14 (1/7)    | 13 (2/16)  | 25 (4/16)  | 13 (2/16)  |

Table S3: Model fit statistics from all fitted models for all *Vibrio* targets. Shown for each model is the chi-squared test statistic ( $\chi^2$ ) and model degrees of freedom (df) with associated P value, Akaike Information Criterion (AIC), difference in Akaike Information Criteria between each model and the best fit model within each group (dAIC; we defined each group as the full suite of iterations of Model A and Model B testing each Chlorophyl a, Pheophytin, and Turbidity as covariates) and the coefficients of determination for the two outcomes, *Vibrio* concentrations measured in seawater ( $r^2$  water) and oyster tissue homogenates ( $r^2$  oyster).

| Target      | Model | Model covariates                 | $\chi^2$ | df | P     | AIC      | dAIC   | $r^2$ water | $r^2$ oyster |
|-------------|-------|----------------------------------|----------|----|-------|----------|--------|-------------|--------------|
| <i>vvhA</i> | A     | Oysters ~ 1 + Temp. + Sal.       |          |    |       |          |        |             |              |
|             |       | Water ~ 1 + Temp. + Sal. + Chlo. | 0.632    | 1  | 0.632 | 2822.743 | 11.262 | 0.437       | 0.347        |
|             |       | Oysters ~ 1 + Temp. + Sal.       |          |    |       |          |        |             |              |
|             | B     | Water ~ 1 + Temp. + Sal. + Pheo. | 3.389    | 1  | 0.066 | 2823.371 | 11.89  | 0.437       | 0.347        |
|             |       | Oysters ~ 1 + Temp. + Sal.       |          |    |       |          |        |             |              |
|             |       | Water ~ 1 + Temp. + Sal. + Turb. | 10.174   | 1  | 0.001 | 2821.423 | 9.942  | 0.462       | 0.347        |
| <i>vvhA</i> | B     | Oysters ~ 1 + Water + Temp.      |          |    |       |          |        |             |              |
|             |       | Water ~ 1 + Temp. + Sal. + Chlo. | 1.457    | 1  | 0.227 | 2823.567 | 12.086 | 0.451       | 0.362        |
|             |       | Oysters ~ 1 + Water + Temp.      |          |    |       |          |        |             |              |
|             |       | Water ~ 1 + Temp. + Sal. + Pheo. | 0.009    | 1  | 0.922 | 2819.991 | 8.51   | 0.456       | 0.325        |
|             |       | Oysters ~ 1 + Water + Temp.      |          |    |       |          |        |             |              |
|             |       | Water ~ 1 + Temp. + Sal. + Turb. | 0.233    | 1  | 0.63  | 2811.481 | 0      | 0.462       | 0.362        |
| <i>pilF</i> | A     | Oysters ~ 1 + Temp. + Sal.       |          |    |       |          |        |             |              |
|             |       | Water ~ 1 + Temp. + Sal. + Chlo. | 1.448    | 1  | 0.229 | 2854.011 | 3.218  | 0.443       | 0.425        |
|             |       | Oysters ~ 1 + Temp. + Sal.       |          |    |       |          |        |             |              |
|             | B     | Water ~ 1 + Temp. + Sal. + Pheo. | 0.389    | 1  | 0.533 | 2859.102 | 8.309  | 0.451       | 0.425        |
|             |       | Oysters ~ 1 + Temp. + Sal.       |          |    |       |          |        |             |              |
|             |       | Water ~ 1 + Temp. + Sal. + Turb. | 5.565    | 1  | 0.018 | 2853.793 | 3      | 0.45        | 0.425        |
| <i>pilF</i> | B     | Oysters ~ 1 + Water + Temp.      |          |    |       |          |        |             |              |
|             |       | Water ~ 1 + Temp. + Sal. + Chlo. | 0.356    | 1  | 0.551 | 2852.92  | 2.127  | 0.444       | 0.558        |
|             |       | Oysters ~ 1 + Water + Temp.      |          |    |       |          |        |             |              |
|             |       | Water ~ 1 + Temp. + Sal. + Pheo. | 5.269    | 1  | 0.022 | 2853.983 | 3.19   | 0.445       | 0.567        |
|             |       | Oysters ~ 1 + Water + Temp.      |          |    |       |          |        |             |              |
|             |       | Water ~ 1 + Temp. + Sal. + Turb. | 3.803    | 1  | 0.056 | 2850.793 | 0      | 0.45        | 0.533        |
| <i>tlh</i>  | A     | Oysters ~ 1 + Temp. + Sal.       |          |    |       |          |        |             |              |
|             |       | Water ~ 1 + Temp. + Sal. + Chlo. | 2.539    | 1  | 0.111 | 2234.208 | 4.167  | 0.438       | 0.338        |
|             |       | Oysters ~ 1 + Temp. + Sal.       |          |    |       |          |        |             |              |
|             |       | Water ~ 1 + Temp. + Sal. + Pheo. | 0.33     | 1  | 0.565 | 2246.336 | 16.295 | 0.444       | 0.338        |
|             |       | Oysters ~ 1 + Temp. + Sal.       |          |    |       |          |        |             |              |
|             |       | Water ~ 1 + Temp. + Sal. + Turb. | 0.369    | 1  | 0.543 | 2248.978 | 18.937 | 0.438       | 0.338        |

|            |   |                                  |       |   |       |          |        |       |       |
|------------|---|----------------------------------|-------|---|-------|----------|--------|-------|-------|
| <i>tlh</i> | B | Oysters ~ 1 + Water + Temp.      |       |   |       |          |        |       |       |
|            |   | Water ~ 1 + Temp. + Sal. + Chlo. | 3.789 | 2 | 0.052 | 2230.041 | 0      | 0.502 | 0.615 |
|            |   | Oysters ~ 1 + Water + Temp.      |       |   |       |          |        |       |       |
|            |   | Water ~ 1 + Temp. + Sal. + Pheo. | 5.477 | 2 | 0.065 | 2249.483 | 19.442 | 0.446 | 0.611 |
|            |   | Oysters ~ 1 + Water + Temp.      |       |   |       |          |        |       |       |
|            |   | Water ~ 1 + Temp. + Sal. + Turb. | 5.078 | 2 | 0.079 | 2251.686 | 21.645 | 0.438 | 0.61  |
| <i>tdh</i> | A | Oysters ~ 1 + Temp. + Sal.       |       |   |       |          |        |       |       |
|            |   | Water ~ 1 + Temp. + Sal. + Chlo. | 0.694 | 1 | 0.405 | 2882.407 | 26.216 | 0.119 | 0.145 |
|            |   | Oysters ~ 1 + Temp. + Sal.       |       |   |       |          |        |       |       |
|            |   | Water ~ 1 + Temp. + Sal. + Pheo. | 0.007 | 1 | 0.934 | 2876.06  | 19.869 | 0.146 | 0.145 |
| <i>tdh</i> | B | Oysters ~ 1 + Temp. + Sal.       |       |   |       |          |        |       |       |
|            |   | Water ~ 1 + Temp. + Sal. + Turb. | 1.419 | 1 | 0.234 | 2853.988 | -2.203 | 0.237 | 0.145 |
|            |   | Oysters ~ 1 + Water + Temp.      |       |   |       |          |        |       |       |
|            |   | Water ~ 1 + Temp. + Sal. + Chlo. | 3.249 | 2 | 0.197 | 2882.961 | 26.77  | 0.112 | 0.031 |
|            |   | Oysters ~ 1 + Water + Temp.      |       |   |       |          |        |       |       |
|            |   | Water ~ 1 + Temp. + Sal. + Pheo. | 5.163 | 2 | 0.076 | 2879.217 | 23.026 | 0.143 | 0.027 |
|            |   | Oysters ~ 1 + Water + Temp.      |       |   |       |          |        |       |       |
|            |   | Water ~ 1 + Temp. + Sal. + Turb. | 5.621 | 2 | 0.06  | 2856.191 | 0      | 0.246 | 0.136 |
| <i>trh</i> | A | Oysters ~ 1 + Temp. + Sal.       |       |   |       |          |        |       |       |
|            |   | Water ~ 1 + Temp. + Sal. + Chlo. | 2.431 | 1 | 0.119 | 2821.771 | 0.806  | 0.105 | 0.304 |
|            |   | Oysters ~ 1 + Temp. + Sal.       |       |   |       |          |        |       |       |
|            |   | Water ~ 1 + Temp. + Sal. + Pheo. | 0.555 | 1 | 0.456 | 2821.505 | 0.54   | 0.106 | 0.304 |
| <i>trh</i> | B | Oysters ~ 1 + Temp. + Sal.       |       |   |       |          |        |       |       |
|            |   | Water ~ 1 + Temp. + Sal. + Turb. | 0.629 | 1 | 0.428 | 2821.345 | 0.38   | 0.107 | 0.304 |
|            |   | Oysters ~ 1 + Water + Temp.      |       |   |       |          |        |       |       |
|            |   | Water ~ 1 + Temp. + Sal. + Chlo. | 3.625 | 2 | 0.163 | 2820.965 | 0      | 0.089 | 0.096 |
|            |   | Oysters ~ 1 + Water + Temp.      |       |   |       |          |        |       |       |
|            |   | Water ~ 1 + Temp. + Sal. + Pheo. | 3.061 | 2 | 0.216 | 2822.012 | 1.047  | 0.094 | 0.093 |
|            |   | Oysters ~ 1 + Water + Temp.      |       |   |       |          |        |       |       |
|            |   | Water ~ 1 + Temp. + Sal. + Turb. | 3.154 | 2 | 0.207 | 2821.87  | 0.905  | 0.091 | 0.095 |
